# Supplementary material for: An interactive meta-analysis of MRI biomarkers of myelin
Source: eLife journal article supplement (doi:10.7554/elife.61523), 2020-10-21
Supplement: supp [file elife-61523-supp-v1.zip]

Archive with 4 entries (4 files):
- elife_poa_e61523_Transparent_Reporting_File.pdf
- elife_poa_e61523_Source_data_1.xlsx
- elife_poa_e61523_Source_code_1.zip
- elife_poa_e61523_Supplementary_file_1.zip
